# Supplementary material for: Experimental Protocol for Phase 1 of the APARC QUOCA (QUasibiennial oscillation and Ozone Chemistry interactions in the Atmosphere) Working Group
Source: Copernicus journal article supplement (doi:10.5194/egusphere-2025-2761), 2025-06-27
Supplement: Supplementary file [file egusphere-2025-2761-AC3-supplement.pdf]

## Response to Reviewer 2

### *Summary*

*This paper is a data description article which introduces the APARC QUOCA. Personally, I planned to anticipate the initiation ceremony of this project, but I was hampered by some temporary assignments. I am happy to review this paper. Generally, this paper is well written and constructed, and this project is clearly introduced. The relationship between ozone and QBO is worth exploring. However, I also find that this study emphasizes the possible relationship between QBO and ozone from a dynamical perspective. Actually, for interactive ozone runs, the chemistry processes might also be responsible for the interaction between ozone and QBO. That is, the relative contribution of the ozone transport and chemical reaction for ozone change and therefore the QBO changes is not well shown. I suggest a revision at the present time (mostly minor points).*

### Major comments

*1. The introduction mentions that the SST changes can more directly influence the QBO amplitude via modifying the Brewer Dobson circulation strength and the non-orographic gravity wave drag forcing. However, it is not easy to quantify the relative contribution of SST and the direct impact of ozone to the QBO amplitude. In my understanding, the SST might be the leading driver for the QBO amplitude and cycle changes. The interactive ozone limitedly affects the QBO amplitude, although some individual models indeed simulate a change of 10-20% in QBO amplitude.*

➔ We thank the reviewer for her/his thoughts. We agree that SSTs are the leading driver of the QBO amplitude and cycle changes, hence our incorporation of the “fixed SST” component of the future (FT) experiments, which have been designed to isolate this contribution. However, as we explain throughout, we are interested in the ozone feedback on the QBO – the reviewer asserts that this influence is small, but our point is that this influence has never been assessed across models in a rigorous apples-to-apples manner. The reviewer seems confident that ozone is a negligible feedback, but the available literature and our preliminary results do not seem to support that assertion.

*2. The largest obstacle for this project is to conquer the model bias in simulation of the QBO amplitude. First, models diverge in the simulate QBO amplitude, and the intermodel spread is much larger than the so-called improved change of the QBO amplitude with interactive ozone. Second, most CMIP5/6 models underestimate the QBO amplitude. Do you have any suggestion whereby the QBO amplitude bias and the so-called QBO amplitude change is well separated.*

➔ Of course – the intermodel spread in QBO amplitude and period is likely to be larger than the ozone feedback simulated within each model. We are not purporting to explain the intermodel spread in the QBO. Rather, we propose that ozone may be one of several – underlooked – contributors to QBO biases in models. The goal here really is to query if the sign of the ozone feedback – on QBO amplitudes, periods, secondary meridional circulation, etc. – is robust across models. Up to this point, a review of previous studies suggests that this is not the case. However, previous studies have also used widely diverging methodologies to define the ozone feedback and structure relevant experiments. To the best of our knowledge, our protocol represents the first attempt to assess the ozone feedback consistently across models, which we (and APARC leadership) assert is a worthy goal.

3. *This paper also plans to store the data on the admin server, where most of the community has no access to this dataset. I suggest to provide the data freely to all users, especially for beginners of the QBO works. CMIP6 data are available for global users. Since this project provides similar variables as in CMIP project, why not follow the CMIP6 project to share the data?*

➔ QUOCA originated as an extension of the APARC QBOi activity. Indeed, QUOCA was created partly as a response to APARC's directive to generate cross-activity working activities that leverage respective benefits from, in this case, QBOi (through QBO resolving models) and CCMI (through full chemistry models). In addition to the history of its nascence, we feel that APARC is, as stated in its mission statement, distinct from the CMIP enterprise in that it is primarily oriented at supporting process-based studies, not informing protocols. That is a critical reason why QUOCA best fits within APARC as its rather idealized experimental structure lends itself to asking questions that would otherwise be challenging to address using simulations constrained with more complex forcings.

4. *To take an example of using the APARC QUOCA project experiments, only one model provides the related runs. The GISS model indeed simulate the QBO amplitude change, but the consistency with other models is unknowns. If one or two more models also provide the experiments and consistent projection at least with the same sign in change, the significance of this project is robustly confirmed. Figure 1 is a study from Butchart et al more than 20 years ago, which is too weak to support this study, and the model the authors used is also not mentioned. If they use a different model from GISS, please also show the relative change of the QBO amplitude with interactive ozone in this different model to support the results from GISS.*

➔ Shown below are preliminary results from the MIROC-E2H model. The other models' contributions are forthcoming. As the reviewer can see and per her/his comment "If one or two other models also provide experiment and consistent projection..." MIROC-ES2H shows an ozone feedback that is **consistent in sign** with what the GISS model shows. Specifically, the QBO period is longer and the QBO amplitudes are larger with ozone interactively calculated. The results from the GISS model, therefore, show promise in the direction toward robustness.

## QUOCA PD Experiment Results from MIROC-ES2H

— INT  
— NINT

Zonal Mean U, Averaged between 5°S-5°N (6-month running mean)

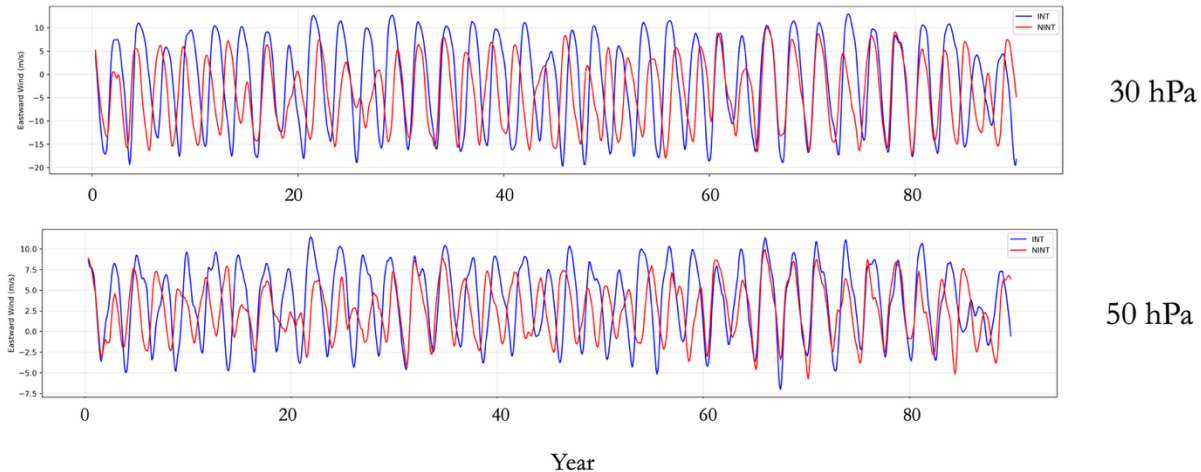

5. The GISS model the authors used is different from the CMIP6 version. I checked the GISS models in CMIP6, but the QBO is not simulated. Please provide relevant information for the difference between this model version and the CMIP6 model version in CMIP6. A general assessment of the model skill should be shown before the project is initialized. Low-skill models might not well answer the questions Q1-5 that is based on the models with a reasonable QBO simulation.

➔ It is unfortunate that the reviewer is **not looking at the right version of the GISS model**. She/he is looking at E2.1 which, consistent with both its lower vertical resolution (40 levels) and lack of convective nonorographic gravity wave drag, does not have a QBO. Please, the reviewer needs to reformulate her/his comment by **looking at the \*\*E2.2\*\* submission**.

6. The questions Q1-5 are repetitive in my understanding. Q1 is ozone => QBO and QBO teleconnections (including QBO downward impact to surface). Q2 is the identical to Q1 but for future scenarios. Ozone => QBO and QBO teleconnections (including large-scale circulation, BDC, and polar vortex). Q3 is repetitive for Q1 and Q2, but emphasizes the mechanism. What is the difference between mechanisms and dynamics? They are the same question. Further, the second question in Q3 is also biased from the main stream of the APARC QUOCA (comparison: CO2 => radiation, chemistry, and therefore circulation VS CO2 => SST changes => circulation). Q4 is 4xCO2 => BDC and polar vortices change => ozone feedback. Q5 is identical to Q4 but for the troposphere: 4xCO2 => troposphere => ozone feedback. Therefore, I suggest to focus on two or three key questions and do not list the question branches as the key questions.

➔ The reason why Q3 is a separate question is because it requires not only the Tier 1, but Tier 2, experiments to be addressed (i.e., the experiments in which the 4xCO2 response is decomposed into contributions from increased SSTs vs. the direct CO2 radiative response). Since many modeling centers may only have the resources to contribute the Tier 1 experiments, it is practically useful to separate Q1-Q3 as we have done. The reviewer should understand that these are difficult times in the United States as computing (and overall

science) resources are heavily stressed, making it challenging for modeling groups to perform both Tier 1 and 2 runs. No changes to the manuscript regarding Q1-Q3.

That said, we do agree with the reviewer that Q4 and Q5 should be combined, particularly as both questions will be addressed by Working Group 4 (mentioned in the discussions). We thank the reviewer for highlighting this point. Please see the revised manuscript.

### **Minor comments**

1. L24: *QBO can also impact the North Pacific pressure (geopotential height). Please refer to Rao et al. 2020a, 2020b (doi: 1175/JCLI-D-20-0024.1; doi: 10.1175/JCLI-D-19-0663.1).*

➔ Correct – we agree with the reviewer and have added these citations.

2. L37: *I am not sure if this feedback is seen in all CMIP6 models? Or this feedback is a result in very few models, and it is not extracted from observations.*

➔ Most CMIP6 models do not run with interactive ozone chemistry, limiting the ability to ask this question. Hence, the need for the QUOCA experimental protocol, so that we can ask this question using fit-for-purpose models and a clean framework.

3. L44: *This QBO biases should be well reviewed before this sentence. The weak QBO and the weak QBO teleconnections of both hemispheres have been reported in Rao et al. 2023ab (doi: ). You must provide the background how the QBO is simulated. The ozone can be prescribed, but the QBO can also be prescribed. If the interaction is focused, the experiment from prescribed ozone to free QBO and from prescribed QBO to free ozone can be setup.*

➔ The reviewer does not seem to appreciate the point of this paragraph, which is focused on identifying how the lack of interactive ozone may contribute (but not entirely explain) existing QBO biases. We understand that the main drivers of QBO biases are likely other aspects of model structural uncertainty, related to (lack of) vertical resolution (and implications for resolved wave forcing) and limitations of parameterizations of non-orographic gravity wave drag. However, these limitations have been well explored in previous studies, while the influence of ozone has not (the whole point of our manuscript). To satisfy the reviewer's concerns we have added one sentence highlighting the potential role of other sources of QBO biases, with appropriate citations, but have not provided a full in-depth review as it is not immediately relevant to the paragraph in question. Please note that the reviewer cites a Rao et al. (2023) study without a doi. Our search did not reveal any such relevant studies, so we have instead chosen to include the Richter et al. (2020) and Holt et al. (2022) references indicated below. We refer the reviewer to the revised manuscript.

Richter, Jadwiga H., James A. Anstey, Neal Butchart, Yoshio Kawatani, Gerald A. Meehl, Scott Osprey, and Isla R. Simpson. "Progress in simulating the quasi-biennial oscillation in CMIP models." *Journal of Geophysical Research: Atmospheres* 125, no. 8 (2020): e2019JD032362.

Holt, Laura A., François Lott, Rolando R. Garcia, George N. Kiladis, Yuan-Ming Cheng, James A. Anstey, Peter Braesicke et al. "An evaluation of tropical waves and wave forcing of the QBO in the QBOi models." *Quarterly Journal of the Royal Meteorological Society* 148, no. 744 (2022): 1541-1567.

4. L48: Butchart et al. 2023 is frequently mentioned in this paper. The change in the QBO cycle is seen in this model, but inconsistent with other models (L53-54). So what can we learn from this inconsistency?

- ➔ Does the reviewer mean Butchart et al. (2003)? Regarding the comment about consistency, that sentence refers to amplitude changes (not cycle/period changes). We ask that the reviewer clarify both the citation and the exact question that is being asked.

5. L79: Projected QBO amplitude has been explored in Rao et al. 2020c GRL (doi: **1029/2020GL089149**). Please refer to this article for details. QBO is weakening, but the extratropical impact is strengthening.

- ➔ First, line 79 does not refer to QBO amplitude. Please provide the correct line number. Second, we are not sure how the Rao et al. (2020c) reference is relevant to QUOCA as it has nothing to do with ozone (and its feedback on the QBO). Please clarify.

6. L81-89: Some aspects of those three questions are repetitive.

- ➔ We ask that the reviewer please clarify precisely which exact aspects are repetitive and in need of changing. It is challenging to make changes in response to a vague request/statement.

7. L103: Can you show the results between 30-50 hPa where the QBO wind variability is largest?

- ➔ Is the reviewer referring to Figure 1? These results are from a paper drafted more than twenty years ago (2003) and none of the authors on that study are on the list of authors on the present manuscript. That said, we can, of course, present to the reviewer the results from the GISS model. Is that of interest? Assuming “yes”, here is the analogous figure to Figure 5, except now evaluated at 30 hPa (top) and 40 hPa (middle). We also include the original plot showing 50 hPa (bottom) so that the reviewer can compare all three levels easily. As she/he can see, the ozone feedback on QBO period (lengthen) and amplitude (increase) is consistent at all three (30,40,50 hPa) levels. We have added a sentence to the revised manuscript commenting on this overall consistency in the response at all three altitudes. We refer the reviewer to the revised manuscript.

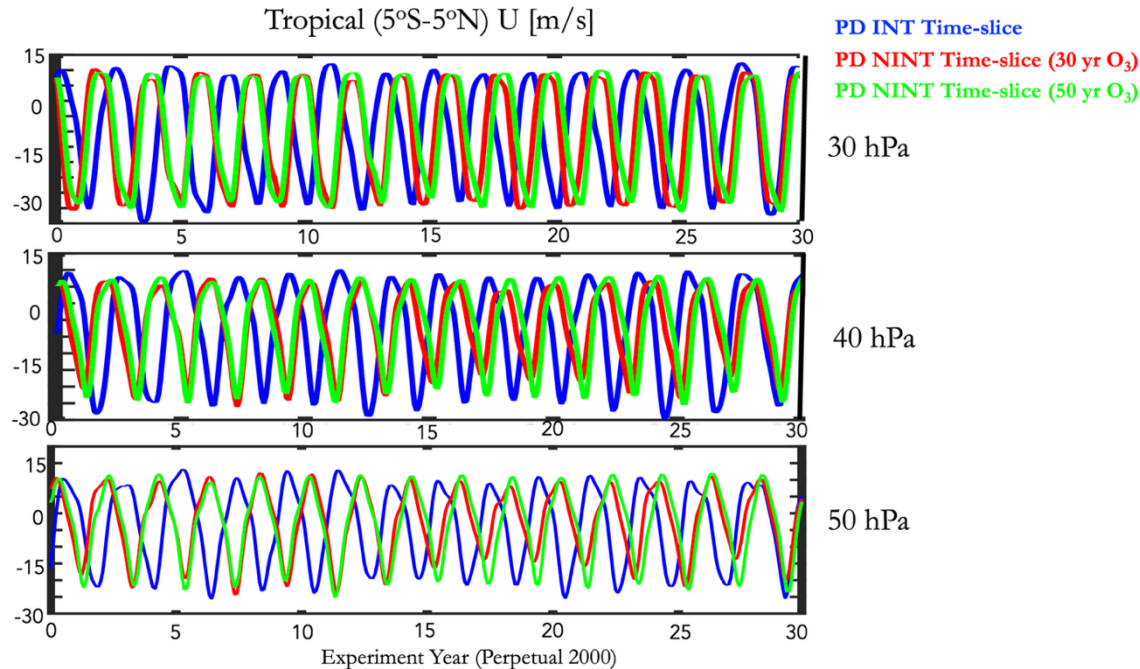

8. L104-105: Here you mention INT and NINT, which mean interactive and non-interactive ozone chemistry. In Figure 2, LINOZ is also an interactive chemistry, although it is simple.

➔ Can the reviewer please clarify her/his point? What is the precise issue being raised here? Linearized ozone schemes are within the hierarchy of interactive chemistry schemes.

9. L110: All ozone variability except the annual cycle is removed. It is not only the ozone related variation that has been removed, the variation related to SST forcing such as ENSO is also removed. This sentence is not accurate enough.

➔ We have modified this sentence by adding “except the annual cycle”. However, we ask that the reviewer please recall that these integrations are time-slice integrations, so ENSO is irrelevant here. Regardless, we have still made the requested change. Please see the revised manuscript.

10. L111-112: Here it is a problem that should be addressed first. If the model is not consistent with observations, the dynamics processes analyzed from models are also unreliable. If the modeled annual cycle is biased from the observed annual cycle, what is the significance of the modelling results?

➔ We privilege self-consistency over bias, meaning that models in which dynamics and chemistry are treated self-consistently can be used as tools to understand mechanisms. This assumption underlies the thousands of papers that have been written using CMIP and other modeling data to try and glean physical understanding. If the reviewer is suggesting that biased models cannot be used to understand mechanisms, then that would imply that no model-based study is instructive for anything, including the several papers that the reviewer asks that we cite. No changes to the manuscript.

11. L116: *The ozone feedback is the difference between interactive and non-interactive chemistry models. I suggest not to include the role of CO<sub>2</sub>, which mainly determines the mean background circulation and climate.*

➔ We appreciate the suggestion, but have decided to retain the experiments querying the ozone feedback in the 4xCO<sub>2</sub> context. There are several pressing science questions related to the ozone feedback in a warmer world (not only related to the QBO, but also to the BDC, polar vortex, etc.) which have expanded the visibility and reach of QUOCA. No changes to the manuscript.

12. Figure 2: *The figure legend is misleading and hard to follow. In my understanding, OMA should be INT, to keep consistency with your description in the introduction section. LINOZ is also a type of INT, but you did not mention in the main part of the section 1.*

➔ We agree with the reviewer that the reference to “OMA” is unnecessarily confusing. We thank the reviewer for her/his suggestion and have replace “OMA” with “INT” in the figure legend. Please see the revised manuscript.

13. Figure 2 caption: *A typo here is picked out. FIXED is a type of non-interactive run, so it should be FT-NINT-1xCO<sub>2</sub> (rather than FT-INT-1xCO<sub>2</sub>). Please clarify.*

➔ Excellent catch – we thank the reviewer for spotting this error! We have fixed this in the revised manuscript.

14. L124: *I agree with this statement. The SST is the determinant factor for the BDC change. Other improvement such as interactive ozone contribute very little to the total change of BDC.*

➔ There is no question that SST's are the primary determinant of changes in the BDC in response to future increases in CO<sub>2</sub>. The reviewer makes a definitive statement about the impact of the ozone feedback on the BDC as though this was a well-established fact that had been reported in numerous studies. This is not the case and will be one of the science questions addressed by the QUOCA protocol.

15. L128-129: *I agree that the boundary conditions are of the first importance to induce the circulation change with global warming. The QBO changes might be very weak and is hard to extract.*

➔ We agree with the reviewer. No changes to the manuscript.

16. L141: *The dampened BDC response sounds like that the CO<sub>2</sub> is more important than ozone for BDC response. Ozone only weakly dampens the total response. Ozone role in BDC change is indeed limited.*

➔ Again, we do not disagree with the reviewer that SST's are the primary driver of the BDC response. No changes to the manuscript.

17. L157-158: *Very repetitive when compared with Q1-3. I have suggested to reconsider the key questions of this project.*

- ➔ We disagree that these are repetitive. Q1-Q3 are specifically concerned with the ozone feedback on the \*QBO\*. Q4 and Q5 (now merged into one question, at the recommendation of the reviewer) address other aspects of the large-scale stratospheric and tropospheric circulation.

18. *Figure 3c is repeating annual cycle of ozone without any QBO signals. What is the purpose for this experiment?*

- ➔ Figure 3 shows the ozone forcing that is used in the PD NINT experiment. It is important for transparency to explain/demonstrate clearly what we are doing in our experiments.

19. L173-174 “while ...”: *Here the CO2 response is mentioned. I disagree that the CO2 response exists. Since you have removed the role of global warming processed by using difference between two 4xCO2 runs. Here the 4xCO2 only creates a different mean state compared with the present-day climate. So it is none of the CO2 response business. That is, this sentence has entangled two questions. Please clarified.*

- ➔ The difference FT-INT-4xCO2 minus FT-NINT-4xCO2 represents the ozone feedback that occurs in the background context of 4xCO2. In other words, it captures the changes that occur **because ozone is responding to 4xCO2**. Similar definitions have been used in previous studies (Chiodo et al. (2018, 2019a,b)) and we are not inventing anything new here. Please refer to those studies. We have now referenced these studies in the manuscript to clarify this point. Please see the revised manuscript.

Chiodo, Gabriel, Lorenzo M. Polvani, Daniel R. Marsh, Andrea Stenke, W. Ball, Eugene Rozanov, Stefan Muthers, and Kostas Tsigradis. "The response of the ozone layer to quadrupled CO 2 concentrations." *Journal of Climate* 31, no. 10 (2018): 3893-3907.

Chiodo, Gabriel, and Lorenzo M. Polvani. "The response of the ozone layer to quadrupled CO 2 concentrations: Implications for climate." *Journal of climate* 32, no. 22 (2019): 7629-7642.

20. *Table 1: FT-NINT-4xCO2, O3 should be “Climatological PD-INT” or “Same as above”. I am not sure why the description is different from PD-NINT*

- ➔ Technically speaking, the description is correct as is, given that the PD-NINT climatology is derived from PD-INT. We agree with the reviewer, however, that this is probably unnecessary (not to mention there is an erroneous parenthesis that needs to be removed). This has been fixed in the revised manuscript.

21. L184: *I did not see input4MIPs in Table 1.*

- ➔ We have now added this to the table. Please see the revised manuscript.

22. L195: *I wonder if the three climatologies are different from each other. If so, how do you explain this difference?*

- ➔ The reviewer makes a good point that one might expect small differences among the climatologies and, therefore, small differences among the resulting ensemble members (constrained with these ozone fields). However, preliminary experiments that we performed



using the GISS E2-2 model (now shown below) comparing this ensemble approach with a more conventional approach show that the resulting spread in the QBO is similar in magnitude. More precisely, the figure below shows that three NINT ensemble members (blue), generated using the proposed approach (i.e., each constrained with a distinct ozone climatology derived from non-overlapping 30-year windows from the PD INT integration) all show a reduced QBO period (by  $\sim 2.7$ - $3.3$  months) and reduced amplitude (by  $\sim 4.7$ - $6.2$  m/s).

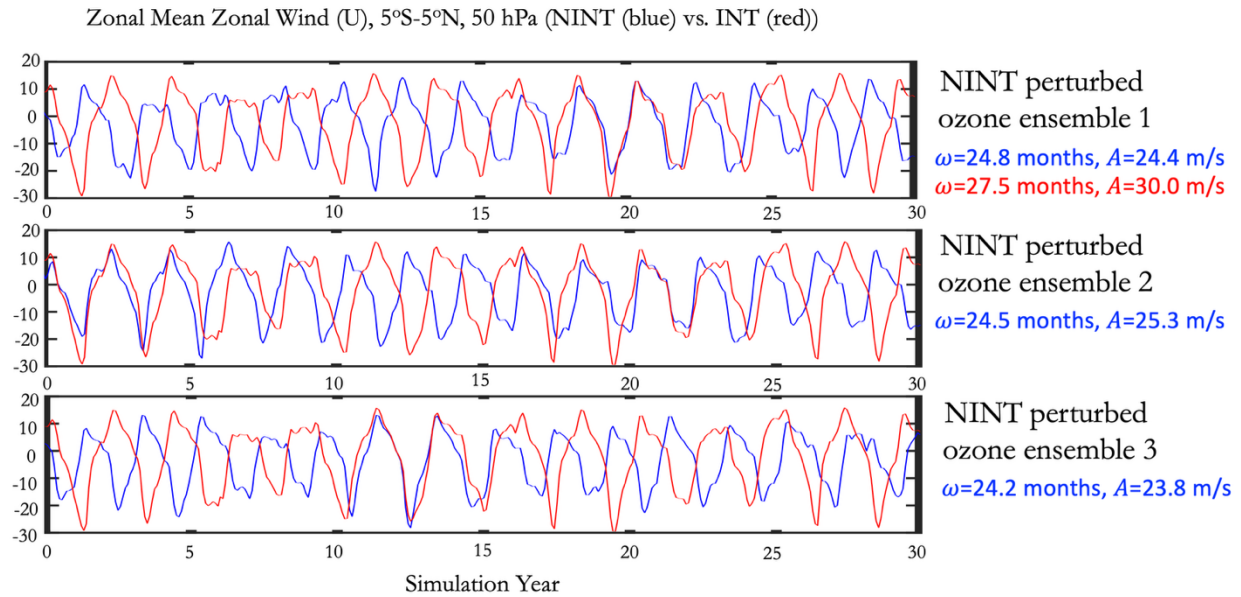

When we compare the intra-ensemble spread in this response to the responses in NINT simulations constrained with *same* ozone fields, but with slight differences in their initial atmospheric conditions (specifically, random perturbations in their tropospheric temperatures that are at most order  $\sim 1^\circ\text{C}$ ) we also find a reduction in QBO period with a similar spread (between  $\sim 2.8$ - $3.1$  months) and QBO amplitude ( $\sim 4.9$ - $6$  m/s). This is shown below.

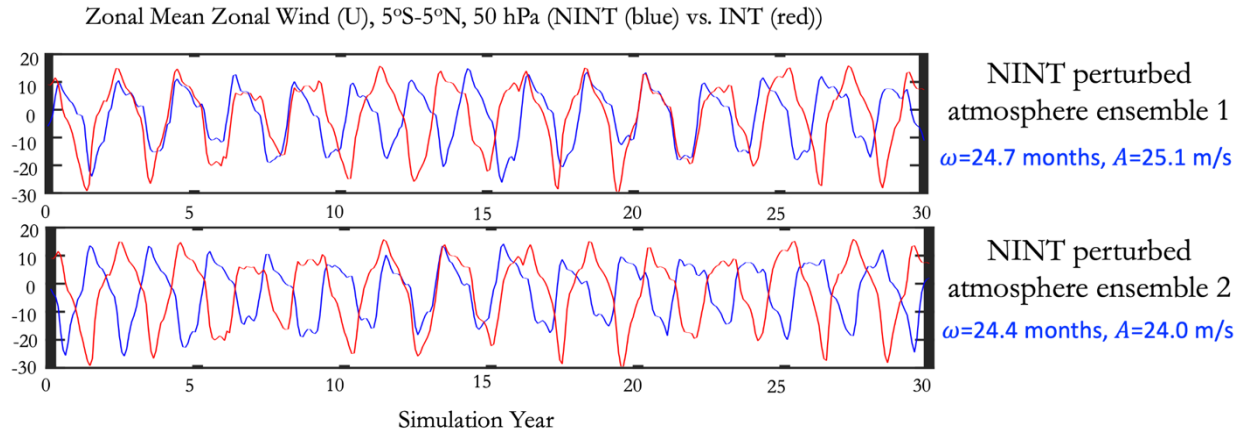

We conclude, therefore, that the ensemble spread generated through use of these different ozone fields is similar to that generated from more standard approaches. We have added two sentences to the manuscript explaining our motivation for using this approach. Please see the revised manuscript.

23. *Once does not mean the improvement of those experiments. I still believe that the observational cycle shows some significance.*

➔ As discussed before, we privilege self-consistency within a given model (i.e., a self-consistent relationship between temperature, the circulation and ozone), even if that implies bias relative to observations. We refer to the reviewer to our response to the earlier related comment.

24. L214-215: *SST changes the property of QBO, which has been reported in Zhu and Rao 2025 (doi: /10.1016/j.atmosres.2025.108241)*

➔ Indeed, SST changes the QBO via direct and indirect (non-orographic gravity wave drag) means. This is well established and there is no need to include unnecessary citations at this point.

25. *Figure 5: 30-yr and 50-yr PD NINT runs show nearly identical results. The cycle and amplitude of the QBO is nearly unchanged. What the mean QBO amplitude in the three runs if you use the method of Wang et al. 2025 (doi: 1016/B978-0-443-15638-0.00013-7)?*

➔ What motivation does the reviewer provide for raising this question? The Butchart et al. (2023) method applied here is quite standard and more widely applied than that of Wang et al. (2025). If the reviewer has physical grounding for suggesting that the Butchart et al. (2023) method is flawed, we ask that she/he provide this as motivation for performing new analysis. No changes to the manuscript.

26. L228-229: *The underestimation of the QBO amplitude should be included in the review of the existing literature in ample evidence (Anstey et al. 2019; Rao et al. 2020a, 2020b ...)*

- ➔ We agree with the reviewer that more references should be included. We have included the suggested citations, at least the Rao, Garfinkel and White (2020) reference as this comments directly on the QBO representation in historical simulations (the other Rao et al. (2020) study is less relevant as it addresses future changes). Furthermore, it is not clear which Anstey et al. (2019) citation is being referenced, and we do not want to speculate on what the reviewer intended to write. Please see the revised manuscript.

27. L234-236: *Both models and observations provide evidence. Add some observation evidence. Lu et al. 2024 CAWE (doi: 10.16/j.wace.2023.100627), 2025 Comm. (doi: 10.1038/s43247-024-01812-x)*

- ➔ We are more than happy to incorporate new citations. However, we are a bit concerned that the reviewer is asking us to cite studies that are not exactly relevant. In particular, these lines in the manuscript describe the process by which during the westerly phase of the QBO, anomalous downwelling associated with warmer anomalies with easterly wind shear bring air from the troposphere into the lower stratosphere, resulting in lower ozone. However, both of the references that the reviewer claims are critical to cite are not about the QBO. They are about (high latitude) stratospheric sudden warmings. Citing the proposed studies would be misleading at best, and, more likely, reflective of sloppy writing.

28. L238-239: *The role of the chemistry should be mentioned in the introduction earlier. Please tell readers clearly where dynamics dominates and where chemistry dominates.*

- ➔ We are confused by the reviewer's request here. She/he asks that we explain "clearly where dynamics dominates and where chemistry dominates". However, the lines that are being referenced literally state "While below 20 hPa, the ozone variations are more clearly modulated by transport associated with QBO dynamics, above 20 hPa, the ozone anomalies...[are] controlled more directly by variations in photochemistry." We provide the answer (~20 hPa) that the reviewer seeks. We ask that the reviewer please clarify what she/he is seeking.

29. 245: *As I point out in the major comments, why does the CMIP6 GISS model not simulate the QBO?*

- ➔ Again, the reviewer is looking at the **\*wrong model\***. We find it very concerning that the reviewer has not taken the time to ensure that she/he is looking at the right model. Please consider the correct model: **GISS E2-2**, not E2-1.

30. L266: *Figure 2 has shown the linear ozone chemistry, but the introduction to the linear chemistry appear here, much later than expected.*

- ➔ Our apologies, but there is no clear directive provided here. We will wait to hear back from the reviewer about when she/he expects that linearized ozone chemistry be introduced in the manuscript.

31. Table 2, 3: *I only have some knowledge that only four of those models can simulate the QBO (GEOSCCM, CESM2-WACCM, UKESM1, and MIROC6), if the model versions in CMIP5/6 is examined. Other models are unfamiliar to me and probably other readers.*

- ➔ We find it concerning that the reviewer is conflating her/his knowledge with the actual state of QBO simulations in models. In particular, while the reviewer may know of only these particular models, the additional models (unknown to the reviewer) are well-established leading chemistry models, many of which participated in CCMI. The reviewer appears to only know about the CMIP6 models but, of course, we are specifically leveraging the well-established chemistry climate modeling capabilities of the CCMI models to address this question. The reviewer does not seem to appreciate that we have been intentional in our attempt to bridge the resources from CCMI and QBOi, which is unfortunate. No changes to the manuscript.

32. L320: *data is => data are*

- ➔ We thank the reviewer for catching the error. This has been fixed in the revised manuscript.

33. L325: *JASMIN is only friendly to registered users. Do you have a plan B that share the datasets with more users?*

- ➔ As a working group within the QBOi activity our data archiving policy is consistent with what is being used in QBOi, which leverages JASMIN and CEDA. QBOi is considering the possibility of becoming a MIP within the CMIP7 enterprise, which would expand access to other users. However, QBOi (and QUOCA) are fundamentally process-oriented, not policy, multi-modeling exercises and therefore reside most naturally within APARC. Depending on how those discussions go there may be an eventual transition to CMIP7.

34. L346: *AMIP is good, but it lacks the air-sea interaction (or feedback from the sea). Can you have any better methods of assessing the role of the interactive ozone?*

- ➔ It is not clear exactly what the reviewer means by “better”? We already mentioned our concern with using a coupled atmosphere-ocean framework. As such, it is challenging to respond to this question without a clearer understanding of what the reviewer seeks. No changes to the manuscript.

35. L358-369: *Theme 1 + Theme 2 can be VS Theme 3.*

- ➔ We have already completed organization of the working groups and the most balanced (in size and expertise) situation consists of having contributors to (separate) Themes 1, 2 and 3. Not only is this scientifically defensible, it makes the most practical sense. No changes to the manuscript.
